# Supplementary material
Source: publisher figshare collection journal article supplement (https://acs.figshare.com/ndownloader/files/8277197)
Supplement: Supplementary file 1 [file 8277197]

# Supporting Information

## Specific Imaging of Intracellular Lipid Droplets Using a Benzothiadiazole Derivative with Solvatochromic Properties

Hanna Appelqvist,<sup>1</sup> Kati Stranius,<sup>2</sup> Karl Börjesson,<sup>2</sup> K. Peter. R. Nilsson,<sup>1</sup>  
and Christine Dyrager\*,<sup>1</sup>

<sup>1</sup>Department of Physics, Chemistry and Biology, Linköping University, 581 83 Linköping, Sweden

<sup>2</sup>Department of Chemistry and Molecular Biology, University of Gothenburg, 412 96 Göteborg, Sweden

**\*Corresponding author:** Christine Dyrager, Division of Organic Chemistry, Department of Physics, Chemistry and Biology, Linköping University, SE-58183, Linköping, Sweden. Phone: +4613281311, e-mail: christine.dyrager@liu.se

### Table of Contents

|                                                                                                     |    |
|-----------------------------------------------------------------------------------------------------|----|
| <i><sup>1</sup>H- and <sup>13</sup>C-NMR spectra of LD-BTD1</i> .....                               | S2 |
| <i>Figure S1. Fixed cells stained with LD-BTD1</i> .....                                            | S3 |
| <i>Figure S2. Higher gain image of fibroblasts stained with LD-BTD1</i> .....                       | S3 |
| <i>Figure S3. Melanoma cells stained with LD-BTD1 at different concentrations</i> .....             | S3 |
| <i>Figure S4. Co-staining of LD-BTD1 and various cell organelle markers</i> .....                   | S4 |
| <i>Figure S5. Fibroblasts and melanoma cells stained with Nile Red</i> .....                        | S4 |
| <i>Figure S6. Emission spectra of LD-BTD1 and Nile Red</i> .....                                    | S5 |
| <i>Figure S7. Isolated adipocytes stained with LD-BTD1</i> .....                                    | S5 |
| <i>Figure S8. Absorbance spectra of LD-BTD1 in solvents of different polarity</i> .....             | S5 |
| <i>Figure S9. Emission spectra of LD-BTD1 in solvents of different polarity</i> .....               | S6 |
| <i>Figure S10. Lippert Plot of LD-BTD1 in solvents of different polarity</i> .....                  | S6 |
| <i>Figure S11. Emission spectra of LD-BTD1 in DMF with increasing conc. of H<sub>2</sub>O</i> ..... | S6 |
| <i>Figure S12. Absorbance and emission spectra of LD-BTD1 in DMSO/H<sub>2</sub>O</i> .....          | S7 |
| <i>Figure S13. Emission spectra of LD-BTD1 at different pH-values</i> .....                         | S7 |

$^1\text{H}$ -NMR and  $^{13}\text{C}$ -NMR spectra of **LD-BTD1** in  $\text{CDCl}_3$ .

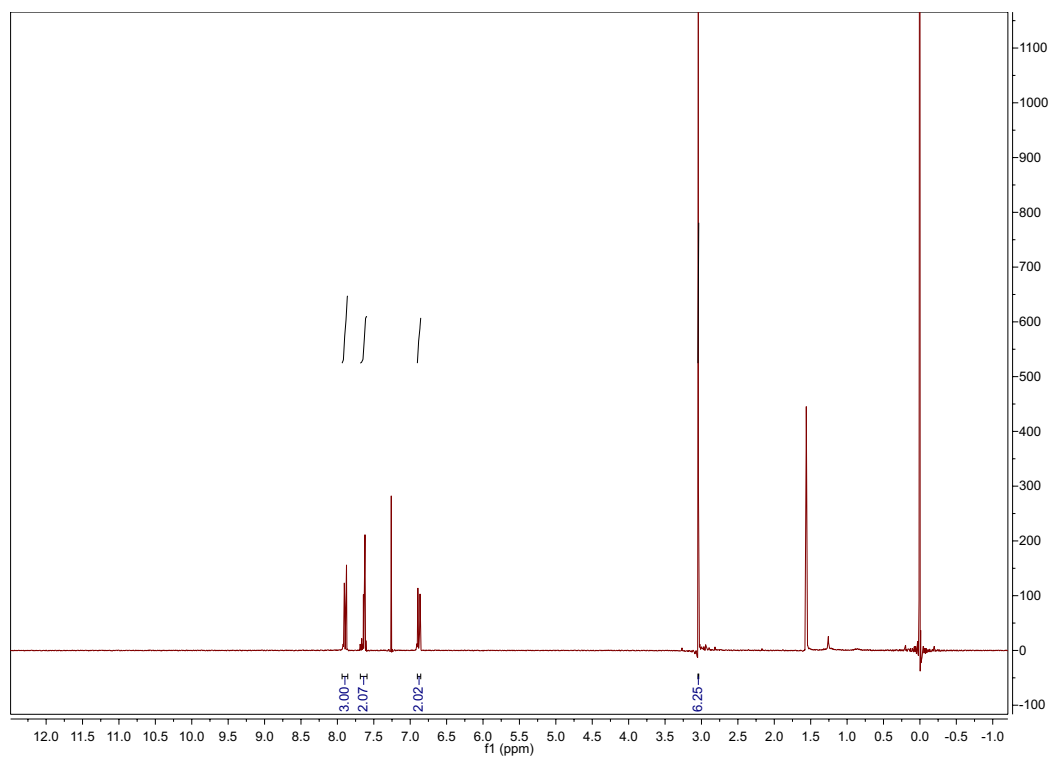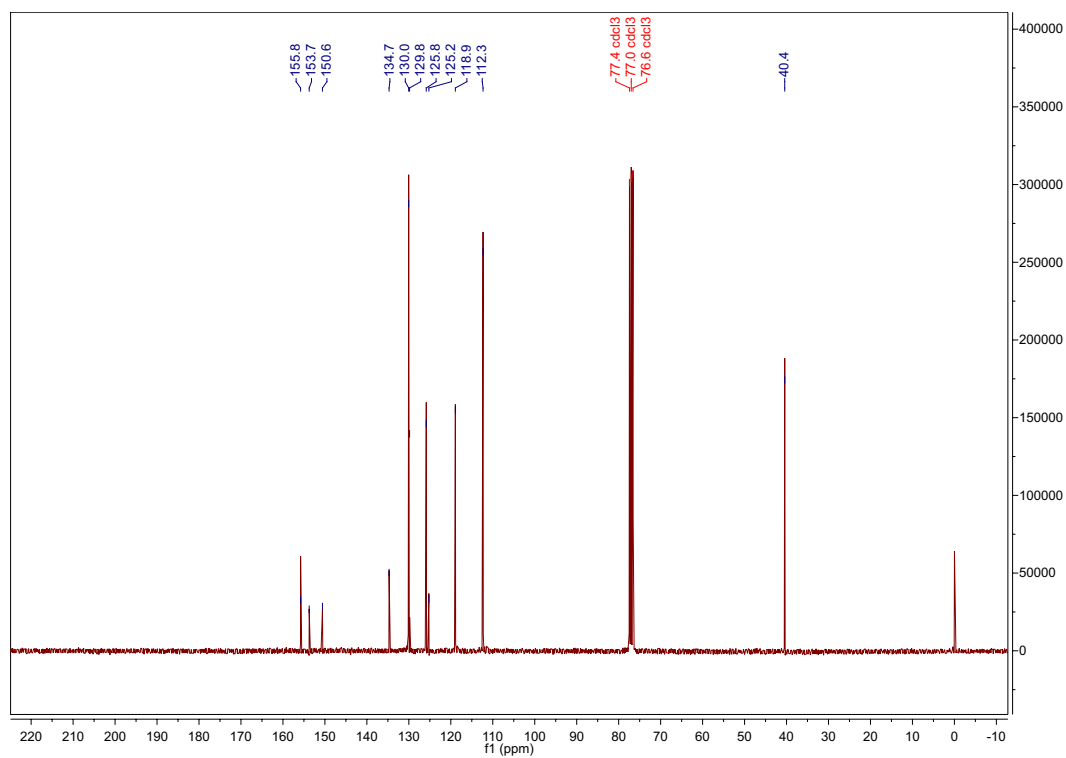

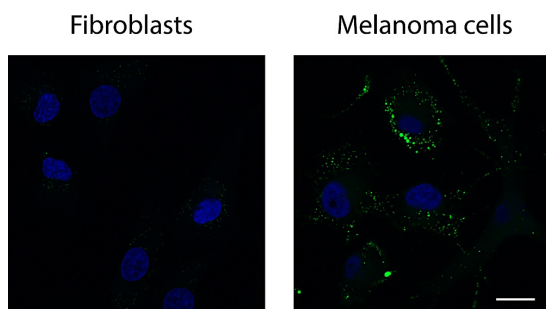

**Figure S1.** Human fibroblasts and melanoma cells stained with **LD-BTD1** (seen in green; ex 458 nm, em 465-682 nm) after cell fixation (500 nM, 30 min, RT). Cell nuclei are stained with DAPI (seen in blue; ex 405 nm, em 410-453 nm). Scale bar 10  $\mu$ m.

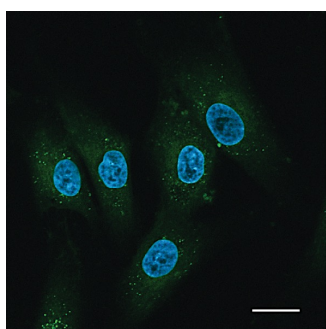

**Figure S2.** Human fibroblasts stained with **LD-BTD1** (seen in green; ex 458 nm, em 465-682 nm) at 10  $\mu$ M for 24 h. Images were taken with higher gain compared to Figure 1A. Cell nuclei are stained with DAPI (seen in blue; ex 405 nm, em 410-453 nm). Scale bar 10  $\mu$ m. Living cells were stained with **LD-BTD1**, fixated after 24h, and mounted prior to microscopy analysis.

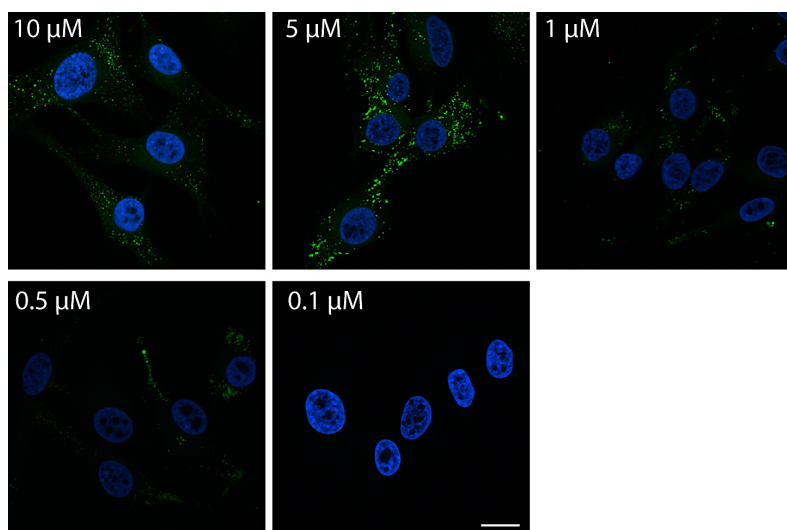

**Figure S3.** Melanoma cells stained with **LD-BTD1** (seen in green, ex 458 nm, em 465-682 nm) using different concentrations (0.1, 0.5, 1, 5, and 10  $\mu$ M). Cell nuclei are stained with DAPI (seen in blue; ex 405 nm, em 410-453 nm). Scale bar 10  $\mu$ m. **LD-BTD1** staining was performed on living cells, which were fixated after 24 h incubation (prior to the microscopy analysis).

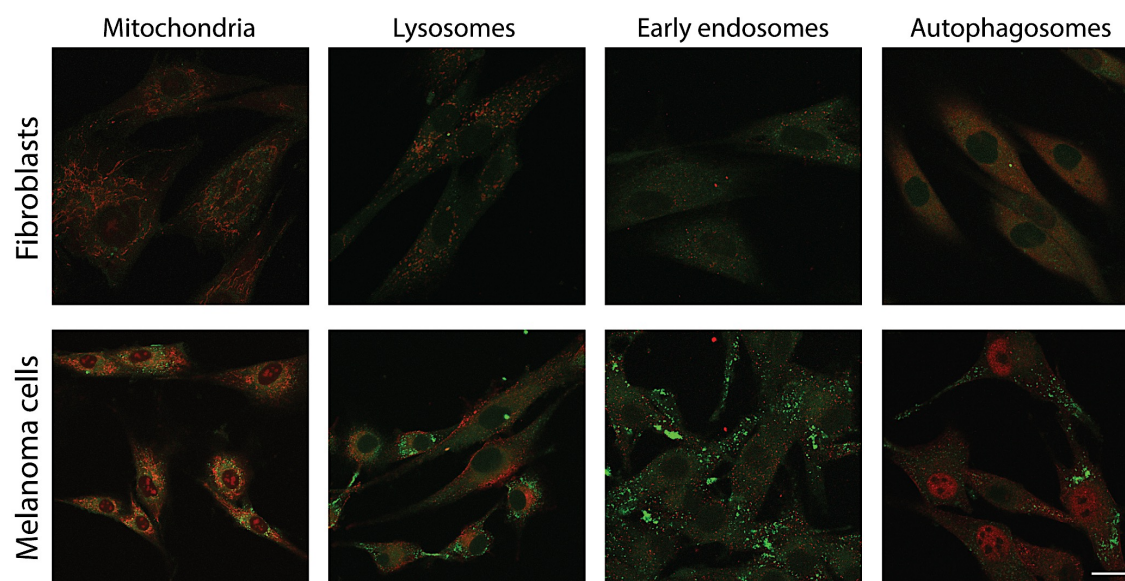

**Figure S4.** Co-staining of **LD-BTD1** (10  $\mu$ M, 24h) seen in green (ex 458 nm, em 484-707)\* and markers (seen in red) for mitochondria (Mitotracker Orange CMTMRos; ex 550 nm, em 555-750 nm), lysosomes (LAMP-2), early endosomes (EEA1) and autophagosomes (LC3B). Secondary antibodies for LAMP-2, EEA1 and LC3B were conjugated to Alexa Fluor 594 (ex 595 nm, em 600-734). Scale bar 10  $\mu$ m. **LD-BTD1** staining was performed on living cells, which were fixated directly after the incubation (prior to the microscopy analysis). \*The emission range for **LD-BTD1** in the co-localization experiment with mitochondria were: em 466-545 nm.

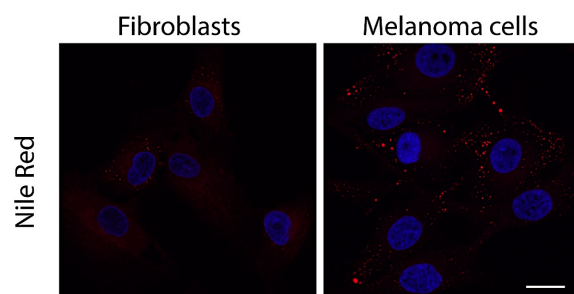

**Figure S5.** Fibroblasts and melanoma cells stained with Nile Red (0.1  $\mu$ g/ml in 150 mM NaCl, 10 min) seen in red (ex 458 nm, em 465-682nm). Cell nuclei are stained with DAPI (seen in blue; ex 405 nm, em 410-453 nm). Scalebar 10  $\mu$ m. Nile Red staining was performed on fixed cells.

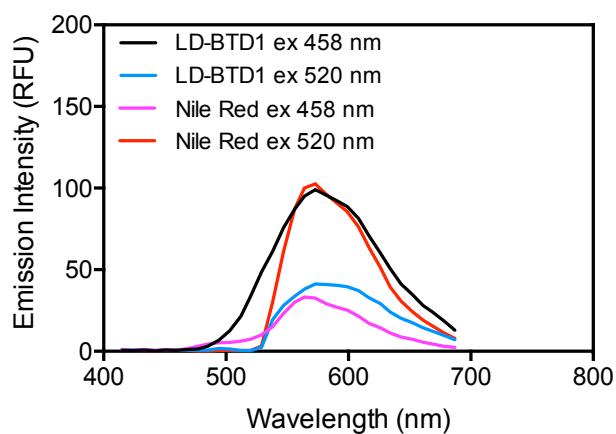

**Figure S6.** Emission spectra from the confocal microscopy study of melanoma cells stained with **LD-BTD1** or Nile Red using two different excitation wavelengths (458 and 520 nm).

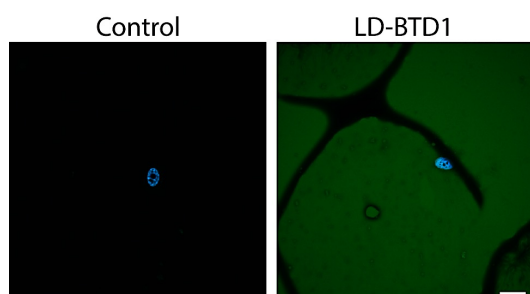

**Figure S7.** Isolated human adipocytes stained with **LD-BTD1** (seen in green; ex 458 nm, em 465-682 nm) at 10  $\mu$ M for 24 h. Cell nuclei are stained with DAPI (seen in blue; ex 405 nm, em 410-453 nm). Scalebar 20  $\mu$ m. **LD-BTD1** staining was performed on living cells, which were fixated directly after the incubation (prior to the microscopy analysis).

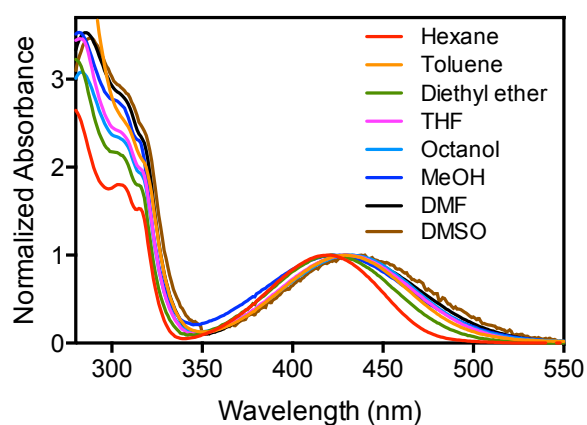

**Figure S8.** Normalized absorbance spectra of **LD-BTD1** in solvents of different polarity.

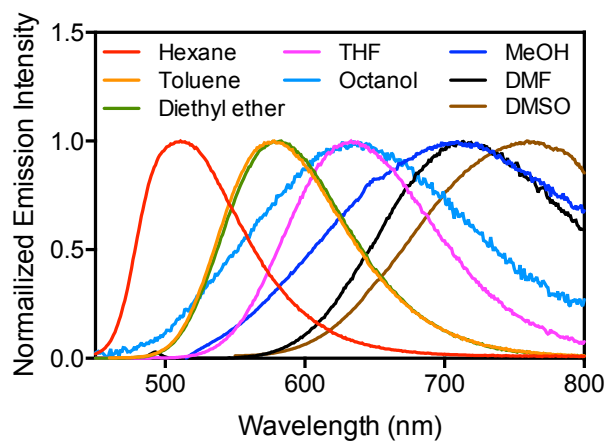

**Figure S9.** Normalized emission spectra of **LD-BTD1** in solvents of different polarity.

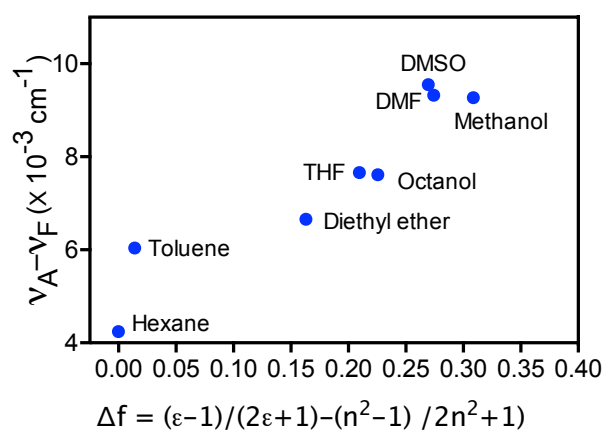

**Figure S10.** Lippert plot for **LD-BTD1** in solvents of different polarity. The orientation polarizability  $\Delta f$  is dependent on the refractive index ( $n$ ) and the dielectric constant ( $\epsilon$ ) of the solvent.

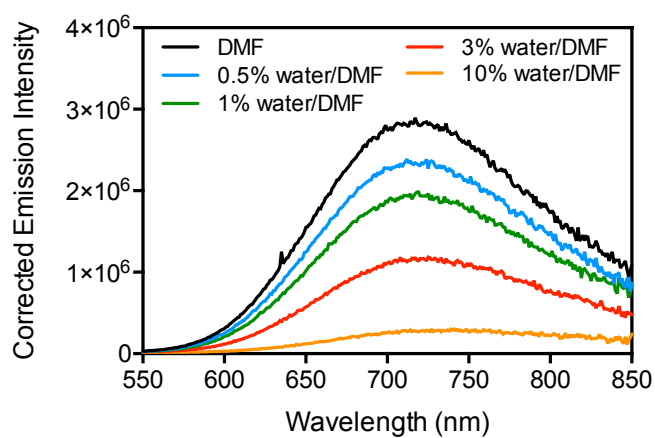

**Figure S11.** Emission spectra (corrected by sample absorbance change upon addition of water) of **LD-BTD1** in DMF upon increasing concentration of water in the solution.

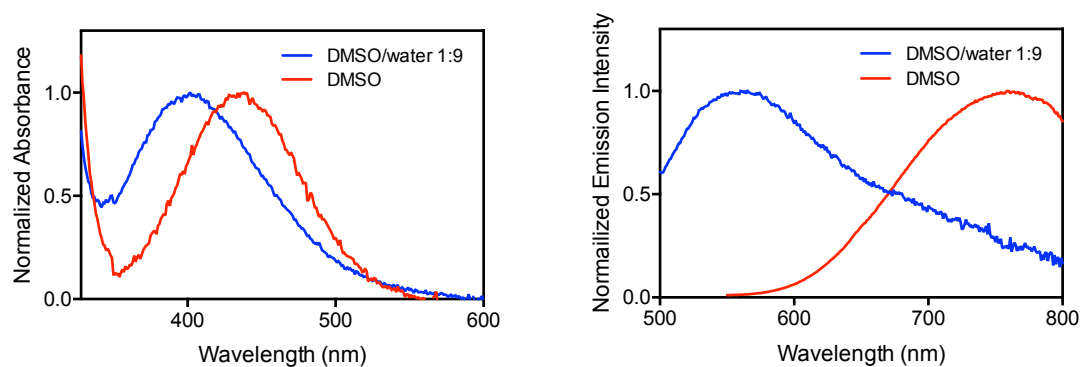

**Figure S12.** Normalized absorbance (left) and emission spectra (right) of **LD-BTD1** in DMSO and DMSO/water 1:9.

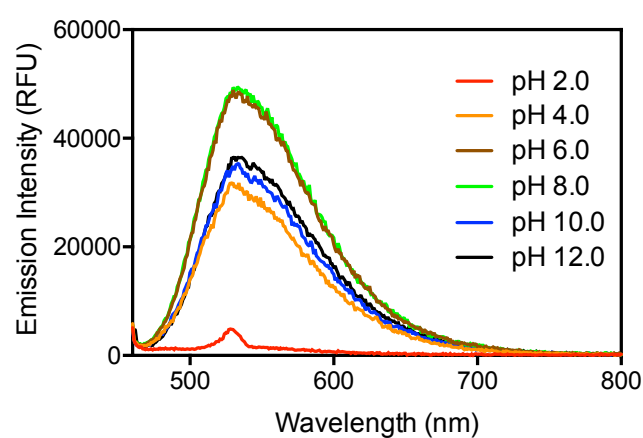

**Figure S13.** Emission spectra of **LD-BTD1** (5% DMSO in buffer) at different pH (2-12). pH 2 and 4: Glycine·HCl buffer (50 mM); pH 6 and 8: phosphate buffer (25 mM); and pH 10 and 12: Glycine·OH buffer (50 mM).
